# Supplementary material for: Mixed Mating System Are Regulated by Fecundity in Shorea curtisii (Dipterocarpaceae) as Revealed by Comparison under Different Pollen Limited Conditions
Source: PLoS One. 2015 May 4;10(5):e0123445. doi: 10.1371/journal.pone.0123445 (PMC4418579; doi:10.1371/journal.pone.0123445)
Supplement: S1 Table — (XLSX) [file pone.0123445.s001.xlsx]

## Sheet: Sheet1
S1 Table. Genetic diversity and exclusion indices for adult trees (with a dbh larger than 20 cm) of Shorea curtisii growing in the Semangkok 6-ha undisturbed and 5.5-ha selectively logged plots
Locus	Number of alleles	Number of adult trees surveyed	Heterozygosity		PIC	Non-exclusion probability		Goodness-of-fit for Hardy-Weinberg equilibrium
			Observed	Expected		First parent	Second parent
Undistubed plot
shc04	16	144	0.84	0.835	0.814	0.488	0.32	NS
shc07	17	144	0.847	0.826	0.808	0.497	0.325	NS
shc09	15	140	0.707	0.82	0.794	0.527	0.354	NS
sle074	5	144	0.542	0.586	0.535	0.818	0.657	NS
sle384	15	144	0.785	0.833	0.81	0.499	0.33	NS
sle392	8	144	0.653	0.608	0.564	0.79	0.621	NS
sle562	11	142	0.866	0.847	0.825	0.477	0.31	NS
sle566	16	144	0.854	0.835	0.814	0.489	0.321	NS
slu044	12	144	0.347	0.378	0.367	0.92	0.771	NS
slu175	8	144	0.653	0.643	0.579	0.777	0.621	NS
Average	12.3	143.4	0.7094	0.7211	0.691	0.6282	0.463
Total exclusion probability (first parent); 0.992969
Total exclusion probability (second parent); 0.999756
Selectively logged plot
shc04	11	37	0.919	0.823	0.787	0.538	0.364	ND
shc07	13	37	0.838	0.799	0.774	0.546	0.366	NS
shc09	9	37	0.703	0.838	0.806	0.51	0.338	ND
sle074	4	37	0.486	0.488	0.424	0.881	0.752	ND
sle384	11	37	0.784	0.794	0.756	0.58	0.403	ND
sle392	6	37	0.541	0.591	0.537	0.811	0.648	NS
sle562	8	37	0.811	0.81	0.771	0.569	0.392	ND
sle566	11	37	0.892	0.822	0.787	0.538	0.364	ND
slu044	7	37	0.324	0.34	0.326	0.938	0.803	ND
slu175	4	37	0.703	0.674	0.599	0.769	0.614	NS
Average	8.4	37	0.7001	0.6979	0.6568	0.668	0.5044
Total exclusion probability (first parent); 0.986274
Total exclusion probability (second parent); 0.999379
